# Supplementary material
Source: PubMed Central journal article supplement (PMC1820668)
Supplement: pnas_0611725104_1.pdf [file pnas_0611725104_1.pdf]

E1 MERSPGEGSPSPMDQPSADPTDQPPAAHAKPDGSGGQVAGGAAEALAVLTSFGRRLVLIIPVYLAFAVGLSVGFVIFGLAIYLGWRRV 94  
 E2 ARRAKTARGLRGRQRGAGAGLSRPGSARAPSPRRGGPENPGVLSVELPGLLAQLARSFALLIPVYALGYLGLSFSWVLLALALLAWCRRS 152  
 E3 MRAEEPCAPGAPSAALGAQRTPELRLSSQLPELCTFVVVRVLFYLGVPVYLAAYLGLSITWLLGLALIMMMWRRN 75  
 Dm MNESPVVPTTPTGNGTPTQTNGNSIVATKSVSDDNSIIFSVFYTLGKKVAIVGSIYLVGYMGVSVAWLIPAVIISVARDQL 83  
 Ag MAGASKELSPKQSAPESESEVAKTKDDSMSTLLYSFAKVVTVYIIFVYGYMGVSVAWLITPVIISVARESW 72  
 Ce MSWQSYLVPLVGSAILSTFTFFLKGWDYSFVWVLIITIASVTK 43

E1 RDEKERSLRAARQLLDDFQLTAKTIYMSHRELPAWVVSFPDVEKAEWLNKIQAQVWVFLGQYMEKILAEETVAPAVRG--SNPHLQTFTRVEL 186  
 E2 RGLKALRLCRALALLEDEERV--VRLGVRACDLPWVHFPPDTERAEWLNKIVKHMWFFICQFIEKLFRETTEPAVRG--ANSHLSTFSFTKVDV 242  
 E3 RRKGLGRLAAAFELDNREF--ISRELRGHLPAWVHFDPDVEREWANKILSQWVFLSLMIMESKFRKLEPKIRE--KTHLRTTFYFKLYF 165  
 Dm AKTSEKKRDIKASALASEKD--VIL-ARIDELPAWVYFPDVERCEWLNKILKQWVFNANHFARTLVKETTIBNVALLALANYKMHGFRFDRIIL 174  
 Ag RKTNDTRRSVAKASALANDKE--VIL-ARLHDLPAWVFPDVERCEWLNKILKQWVFNANFYAKNLIKESIEEPNIQQAMAGYKLNKPKFDRMIL 163  
 Ce SYLWRKRERRLIALRATALREREVIM-AQLQDLPWVQFPDTERVEWLNKVIHQWVYVGYEYTKTFMNDFTITPQVK-AQMPGMFKNEKFKTKMDM 135

E1 GEKPLRIIGVKVHPGQ-RKEQILLDLNINISVGDVQIDVEVKKYFCAGVKGMLQHGVLVRVILEPLTCDLPEVGAVSMFFIRRPDLINWGTMTN 279  
 E2 GQQPRLRINGVKVYTENVDKQIILDLQISFVGNCEIDLEIKRYFCRAGVKSITQIHGTMRVILEPLTCDMPLVGCALSIFFLRKPFLLEINWGTMTN 336  
 E3 GQKCPRVNGVKAHTNTCNRNRRTVDLQICVIGDCETISVELQKI--QAGVNGIQQLGTLRVILEPLTCDKPPVGAIVVFFLQKQHLQINWGTMTN 257  
 Dm GTIPPRIGGVKIVDKNVDRENIIMDLDLFYASDCDINFYLCGM--KGGIKDFQIHGTVRVMKPLIRSMPLVGGQLIFFLNNFNIDFNLVGVID 266  
 Ag GTIPPRIGGVKIVDKNVSRIEIMDLDLFYAGDCDISFALSGL--RGGIKDFQIHGTVRVMKPLISQMLTGGQLIFFLNNFNIDFNLVGVID 255  
 Ce GDIPCRVGGIKVYTIIVGRDRIIVDMVAAGDADFTVSCGF--TGMNNTQFSCKLRALIKPLLPYPPMVGVSSTFLEMFKMDFNLTMGE 227

E1 LLDIIPGLSSLDSTMIMDSIAAFVLPNRLVPLVVDLQDVAQLRSLPRGCIIRIIRHLLAARGSSKDKYVKGILIEGKSDPYALVRLGTQTFCSR 363  
 E1' .....NPQRGSSVDAPPRCHTTTPDSQFGEHTTTPDSQFGEHVLRIHVLEAQDLIAKDRFLGLVKGKSDPYVKLKLGRSFRSHV 701  
 E2 LLDVPLNGLSDTIILDIISNYLVLNRIIVPLVSE-VQIAQLRFFVPKGVLRIRHFTEAQDLQKDYLYLGLVKGKSDPYGIIRVGNQIFQSRV 429  
 E3 LLDAPGINDVSDSLEEDLIATHLVLNRRVTVV-KKGLDLTNRFPPLPCGVIRVHLEAEQLAQDNFL-GL-RGKSDPYAKVSIQLOHFRSRT 348  
 Dm FMDMPGLSDLDRRIIVEQIGNVMVLPNKLPISLSEE-VSAVALKMPPEPEGVLRIRHVVEAKDLMKKDIISVLC--KGKSDPYAIIIVGACEFKTQI 357  
 Ag LLDMPGLSDILRKIIIVEQVNAEIMDLDLFYAGDCDISFALSGL--RGGIKDFQIHGTVRVMKPLISQMLTGGQLIFFLNNFNIDFNLVGVID 346  
 Ce MVELPGLIDAIRSVINSQIAALCVLPNEIVVPLAPD-VDTQLYFPEPDPVVRKLIIEAKNLENRDISFIK--KGKSDPYAIIIVGACEFKTRT 318

-----β2-----β3-----β4

E1 IDEELNPQWCEIYEVVMVHEVPGQIEVEVEFDKD-PDKDDFLGRMKLDVGVKVLQASVLDWDFLQGGQ-GQVHRLREWLISLSDAEKIEQVILQVN 465  
 E1' VREDLNPRWNEVFEVIVTSVPGQIEVEVEFDKD-LDKDDFLGRCKVRLTTLVNSGFLDEWLTLEDVPSGRHLRLERLTPRPTAAEIEEVLQVN 794  
 E2 IKENLSPKWNEVYEAALVYEHQLELLELDED-PDKDDFLGSLMIDLIEVEKERLLEWFTLEDVDPKGLHLRLEWLTLPENASNDKVLTDI 522  
 E3 IYRNLNPTWNEVFEFMVYEPGQLELLELDED-IDRDFDLGSLQICLGDVMTNRVVDWDFVLDNDDTSGRHLRLEWLTSLTD---QEVLTE 437  
 Dm IDNNVNPKWVCEAFVIEIQGFVEIQDKDSDSKKDEINLRASDIASVILKGVVDSVWLTLEDADKHLHLVRLQVYKLTADPNDIQQILLET 451  
 Ag IDNTVNPKWVCEAFIHAESGQTLQVINDDED-AGEDELGRATVEISSVTKNGEIDTWTLEQAKHGLVHLRMTWFKLSSEKSDIKQALBET 439  
 Ce IDDDLNPVWNEVFEAVVDQADGQKRLRIELEDDED-QKDEELGRLSVLDLKVQAKGTIDKVVYLEGCKHCDLHIIKATVMNLSDELHIEKQEWEA 411

-----β5-----β6-----β7-----β8-----β1-----

E1 WGV-SSRPDPPSAAILLVVYLDRAQDLV-----MVTSELYPPOLKKGKNEENPMVQLSIQDVT-DESKAVYSTNCPVWEEAEFRFFLQD 545  
 E1' SLIQYQKSAELAAALISYMERAEADL-----LRKGTKHLSPPYATITVGDSS-HKTKTISQTSAPVWDESASFLIRK 865  
 E2 KADKQDANDGLSSALLLILYLDARNLPSNPLDFNPGVLLKSAVORALKSGKRISSNENPVQMSVGHKA-DESKIRYKNEPVWEEAEFRFFLIRK 615  
 E3 HG-----GLSTALLVVVFLDSACNLRPNPFDYLNGEYRAKLSRFA--RNKVKDSSVYKLSVCKKT-HTSKTCPHNKD PVWEEAEFRFFLIRK 521  
 Dm QL---LRVTSMSAVLSVFD SARHLK-----QARSSSKPDPYLVCSVNKQK-OQTAMIMRDDS PVWEEAEFRFFLIRK 519  
 Ag QH---LRVTSMSALLTVFIDS AKNLP-----QARQSQDPYLVLSVCKKN-EQTSVQMRTPD PVWEEAEFRFFLIRK 507  
 Ce EW--QADKPIHSAALLMVYIDSVADLP-----YPKSKLEBSPFVEVSLGCKETORTPVKVKTVNPLFQSKLEFFVRH 480

-----β2-----β3-----β4-----β5-----

E1 PQSQDLVQVYKDSRALTLCALTPPLARLITAPEL-ILDQWFLSSSGPNSRLYMKIVMRILYLDSSIECFPTVHGCPGAWVDVSE..... 630  
 E1' PHTESLQVREGEGTG-VLGSLSLPLSELLVADQL-CLDRWFLS-SGQOVL-LRAQLGILVSHQSGVEAHSYSHSSSSLSLSE----- 946  
 E2 PKRQDLEVEVRDEQHCSSLGNLKVPLSLLTISEDM-TVSRFQLSNSGGPNTIKMKIALRVLHLEKRRERPDHQHSAQVKRPSVSKGRKTSIK 708  
 E3 VATERHLKVLDDDDQECALGMLEVPICQILPYADL-TLEORFOLDHSGLSDIISRIVLRFLOVEERELGSPYTPGPEALKKGPLLIKKVATNQG 614  
 Dm PDNESLNLIKIDYQKGTNDIGQYTYLSTLTKLQFNMEVIOQPFQOLQKSGPESKLYMSLSLRLLKPGEDKDSDALEQVAALTRSSSVKTPDVAAV 613  
 Ag PDNDTLQKVIDQKGTNTIGLTYILSALMEKKNLEIMSOPFOLQKSGPETKIIMSLSLRILKRHRQEPAVTTDPKGPASEADSVLRSRTSSIR 601  
 Ce LEGQDLKFEAVDDGFRRLSGLSNIPLTTTLTKEPNLBQNOQHMLTLGVHQSPIVITTRIRMLRSDSQQSLNSHGRSNS----- 458

-----β6-----β7-----β8-----β1-----

E2 SHMSGSPGPGSNTAPSTPVIIGSDKPGMEEKAQPPPEAGPQGLHDLGRSSSSLLA----- 763  
 E3 PKAQPEEGPTDLPCCPDASDTKDVSRSTTTTTSATTVAETEPTSQETGPEPKGKDSAKRFCEPIGKKS PATIFLTVPGPHSPGP IKSPRMK 708  
 Dm SPPAFKESQASSKRLSAESP ISEEDPVA----- 641  
 Ag TSASHGSQSETLQQQPSTGDSNAEEAALSHQGSVRKQDSRKSTTSAIMEQMSIQEFP----- 660

E1' --EPELSG-----GPPHITS--SAPELRQRLTHVDSPLLEAPAGLQVQLTTLWYSEERKLVSTVHGCRSIRQ-NGRDPPDPYV--SLLLLP 1026  
 E2 --SEGHISVKEPTPSIASDISLPIATQELRQRLRQLENGTTLCQSPGLQITLIRHSQRNKLIVVHACRNLIA-FSEDGSDPYV--RMYLLP 852  
 E3 CPASFPWAPKRLASMSLSLASSCFDLADISLNI EGGDLRRLGELQITLVRYVCLRQLSVLINGCRNLTP-CTSSAGDPYV--RVYLLP 799  
 Dm --ATKISPMASSTSEKPISEL-ATSVLTHRF--PDSTSPCEHLGRMLGIRYSIRAQRKLDVITHKIQIPLRDPNSIEDPYV--KLYLLP 728  
 Ag --VSTLNTVMMATPPRSPNLSL-GGTELLRS--PSTSSGSAGLGRQITLVAYSVQRQLLVIVHKINNIPLKDPNNIPDPYV--KLYLLP 747  
 Ce -----RLGRLFRSKHEMKKRETRADENRGEIETQIDFDDLNVQLKIALIRCDLMTFDEKDKQCNPYVSVKLVALD 628

-----β1-----β2-----β3-----

E1' DKNRGTKRRTSQKRTLSPEENEFWELPLDEAQRKLDVSVKSNSS-SEMSRERELG--KVQLDLAETDLSQGVARWYDLMNDKDKGSS\* 1114  
 E2 DKRRSGRRKTHVSKRTLNPFVDQSFDFSVLSLPEVQRRTLDVAVK-NSGGFLSKDKGLG--KVLVLAASEELAKGWTQWYDLETGTRPQAMT\* 942  
 E3 ERKWACRKKTSVVKRTLEPDETEFFVPMEEVKKRSLDVAVK-NSRPLGSHRRKELG--KVLIDLSKEDLIKGFQWYELTPNGQPRS\* 886  
 Dm GRTEKESKRTSVIKDNCNPNVYDASFEVILSIAELRQTELEVIVCTQK-GELSGSPLIGMLKIPLDAAEITITQGLNSWFDLQPEIRGE\* 816  
 Ag GRSKESKRTNVKDNCDPVFDITTFYIISNAELVNSELEVIVCTQK-GFP--GSPVLGMQKLSLSDPDISSGOGIKAWYDLEPKSFE\* 833  
 Ce GNKEVFKKKTPTAKNRRHPEFDNHVEIDINPSDLLNHKVVINVKDDTNYGTFVAKPVLGCLERLDSLMNR--QLSRQVILPSVERK\* 713

-----β4-----β5-----β6-----β7-----β8-----
