# Supplementary material
Source: PubMed Central journal article supplement (PMC1820668)

**A**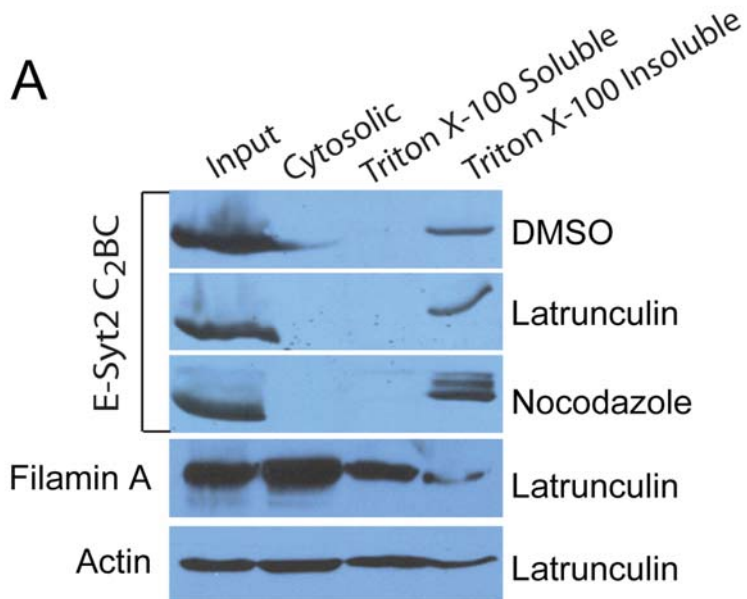**B**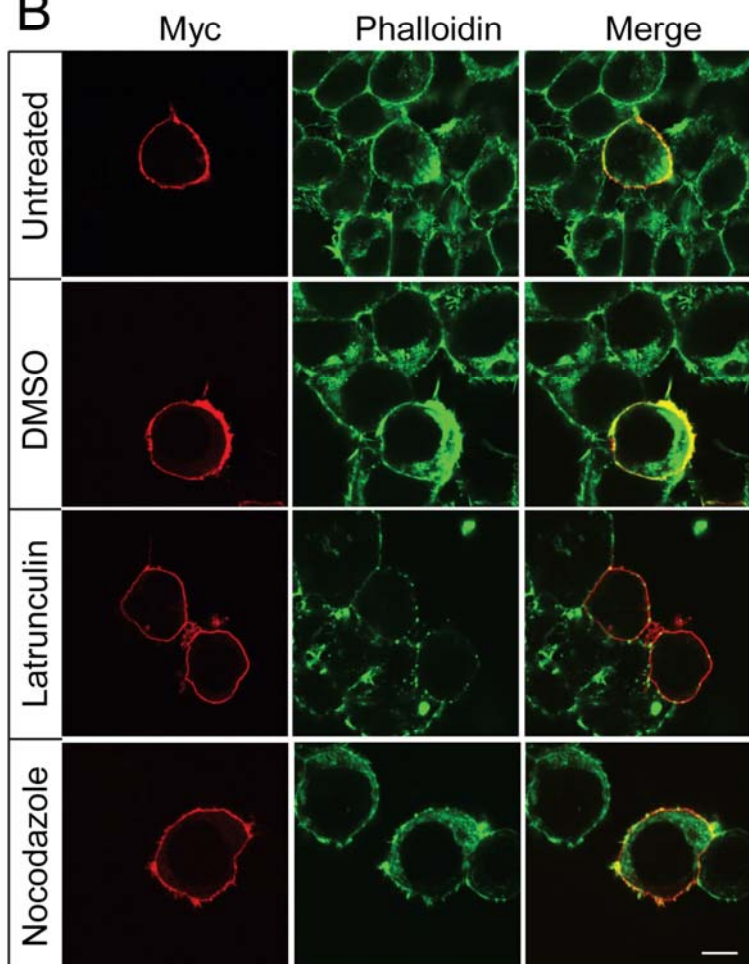

Supplement: pnas_0611725104_3.pdf [file pnas_0611725104_3.pdf]
